# Supplementary material for: The Fatigue and Altered Cognition Scale among SARS-CoV-2 Survivors: Psychometric Properties and Item Correlations with Depression and Anxiety Symptoms
Source: MDPI journal article supplement (doi:10.3390/jcm13082186), 2024-04-10
Supplement: s1 [file s1]

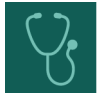

**Table S1.** Correlations between the FACs Fatigue Scale items and the PHQ-8 items.

|                                                                      | PHQ-8_1 | PHQ-8_2 | PHQ-8_3 | PHQ-8_4     | PHQ-8_5 | PHQ-8_6 | PHQ-8_7 | PHQ-8_8 |
|----------------------------------------------------------------------|---------|---------|---------|-------------|---------|---------|---------|---------|
| <b>Fatigue Scale</b>                                                 |         |         |         |             |         |         |         |         |
| Q1: I felt fatigued                                                  | .557    | .532    | .511    | <b>.721</b> | .512    | .416    | .485    | .363    |
| Q2: I felt alert*                                                    | .477    | .443    | .382    | .554        | .370    | .375    | .495    | .317    |
| Q6: I felt worn out                                                  | .522    | .508    | .464    | .664        | .463    | .395    | .478    | .299    |
| Q7: I felt sluggish                                                  | .546    | .506    | .495    | .679        | .460    | .380    | .502    | .337    |
| Q8: I felt run down                                                  | .547    | .518    | .459    | .673        | .473    | .400    | .512    | .321    |
| Q10: I had the energy to do what I wanted to do*                     | .467    | .410    | .382    | .519        | .397    | .345    | .410    | .205    |
| Q13: I had to force myself to get things done                        | .545    | .513    | .410    | .584        | .472    | .421    | .529    | .346    |
| Q15: I felt tired                                                    | .479    | .467    | .469    | .644        | .430    | .370    | .431    | .263    |
| Q17: I had to struggle to finish what I started to do                | .544    | .472    | .439    | .564        | .465    | .427    | .585    | .376    |
| Q20: I had problems feeling energetic no matter if I slept or napped | .583    | .495    | .486    | <b>.708</b> | .506    | .415    | .527    | .354    |

**Table S2.** Correlations between the FACs Fatigue Scale items and the GAD-7 items.

|                                                                      | GAD-7_1 | GAD-7_2 | GAD-7_3 | GAD-7_4 | GAD-7_5 | GAD-7_6 | GAD-7_7 |
|----------------------------------------------------------------------|---------|---------|---------|---------|---------|---------|---------|
| <b>Fatigue Scale</b>                                                 |         |         |         |         |         |         |         |
| Q1: I felt fatigued                                                  | .539    | .505    | .536    | .558    | .412    | .518    | .487    |
| Q2: I felt alert*                                                    | .427    | .415    | .401    | .457    | .336    | .452    | .418    |
| Q6: I felt worn out                                                  | .534    | .495    | .523    | .531    | .399    | .508    | .465    |
| Q7: I felt sluggish                                                  | .523    | .498    | .513    | .530    | .431    | .530    | .483    |
| Q8: I felt run down                                                  | .525    | .476    | .505    | .526    | .404    | .523    | .460    |
| Q10: I had the energy to do what I wanted to do*                     | .387    | .407    | .408    | .419    | .303    | .399    | .349    |
| Q13: I had to force myself to get things done                        | .568    | .520    | .534    | .571    | .453    | .545    | .496    |
| Q15: I felt tired                                                    | .489    | .452    | .485    | .499    | .346    | .479    | .433    |
| Q17: I had to struggle to finish what I started to do                | .531    | .495    | .531    | .543    | .455    | .518    | .485    |
| Q20: I had problems feeling energetic no matter if I slept or napped | .541    | .492    | .527    | .548    | .429    | .528    | .468    |

**Table S3.** Correlations between the FACs Altered Cognition Scale items and the PHQ-8 items.

|                                                                        | PHQ-8_1 | PHQ-8_2 | PHQ-8_3 | PHQ-8_4 | PHQ-8_5 | PHQ-8_6 | PHQ-8_7 | PHQ-8_8 |
|------------------------------------------------------------------------|---------|---------|---------|---------|---------|---------|---------|---------|
| <b>Altered Cognition Scale</b>                                         |         |         |         |         |         |         |         |         |
| Q3: I lost track of what I was going to say                            | .430    | .455    | .403    | .456    | .398    | .346    | .493    | .306    |
| Q4: I was forgetful                                                    | .456    | .487    | .411    | .484    | .358    | .389    | .530    | .354    |
| Q5: I had trouble concentrating                                        | .512    | .494    | .435    | .553    | .411    | .394    | .640    | .389    |
| Q9: I had trouble focusing on things I wanted to do                    | .555    | .517    | .458    | .580    | .479    | .393    | .639    | .381    |
| Q11: I was easily confused                                             | .499    | .437    | .400    | .498    | .378    | .368    | .594    | .461    |
| Q12: I felt “spaced out” like I was in a fog                           | .501    | .487    | .418    | .523    | .392    | .382    | .583    | .442    |
| Q14: I was clear-headed*                                               | .514    | .500    | .401    | .540    | .413    | .425    | .545    | .405    |
| Q16: I didn’t process things as quickly or accurately as I should have | .539    | .530    | .446    | .526    | .439    | .441    | .590    | .389    |
| Q18: I had trouble paying attention                                    | .520    | .490    | .442    | .526    | .454    | .414    | .651    | .413    |
| Q19: It was hard for me to make up my mind and reach a decision        | .482    | .461    | .382    | .485    | .411    | .416    | .569    | .360    |

**Table S4.** Correlations between the FACs Altered Cognition Scale items and the GAD-7 items.

|                                                                        | GAD-7_1 | GAD-7_2 | GAD-7_3 | GAD-7_4 | GAD-7_5 | GAD-7_6 | GAD-7_7 |
|------------------------------------------------------------------------|---------|---------|---------|---------|---------|---------|---------|
| <b>Altered Cognition Scale</b>                                         |         |         |         |         |         |         |         |
| Q3: I lost track of what I was going to say                            | .492    | .442    | .454    | .444    | .355    | .489    | .409    |
| Q4: I was forgetful                                                    | .506    | .457    | .483    | .481    | .396    | .500    | .456    |
| Q5: I had trouble concentrating                                        | .550    | .520    | .545    | .553    | .445    | .561    | .491    |
| Q9: I had trouble focusing on things I wanted to do                    | .565    | .535    | .561    | .563    | .462    | .566    | .502    |
| Q11: I was easily confused                                             | .498    | .463    | .488    | .487    | .465    | .520    | .468    |
| Q12: I felt “spaced out” like I was in a fog                           | .532    | .503    | .535    | .529    | .480    | .541    | .493    |
| Q14: I was clear-headed*                                               | .487    | .460    | .466    | .492    | .444    | .506    | .450    |
| Q16: I didn’t process things as quickly or accurately as I should have | .538    | .508    | .522    | .529    | .446    | .530    | .501    |
| Q18: I had trouble paying attention                                    | .538    | .491    | .530    | .555    | .499    | .548    | .493    |
| Q19: It was hard for me to make up my mind and reach a decision        | .528    | .510    | .524    | .507    | .444    | .537    | .502    |
